# Supplementary material
Source: PubMed Central journal article supplement (PMC7510951)
Supplement: NIHMS1589489-supplement-1.pdf [file NIHMS1589489-supplement-1.pdf]

**Supp. Fig. 1**

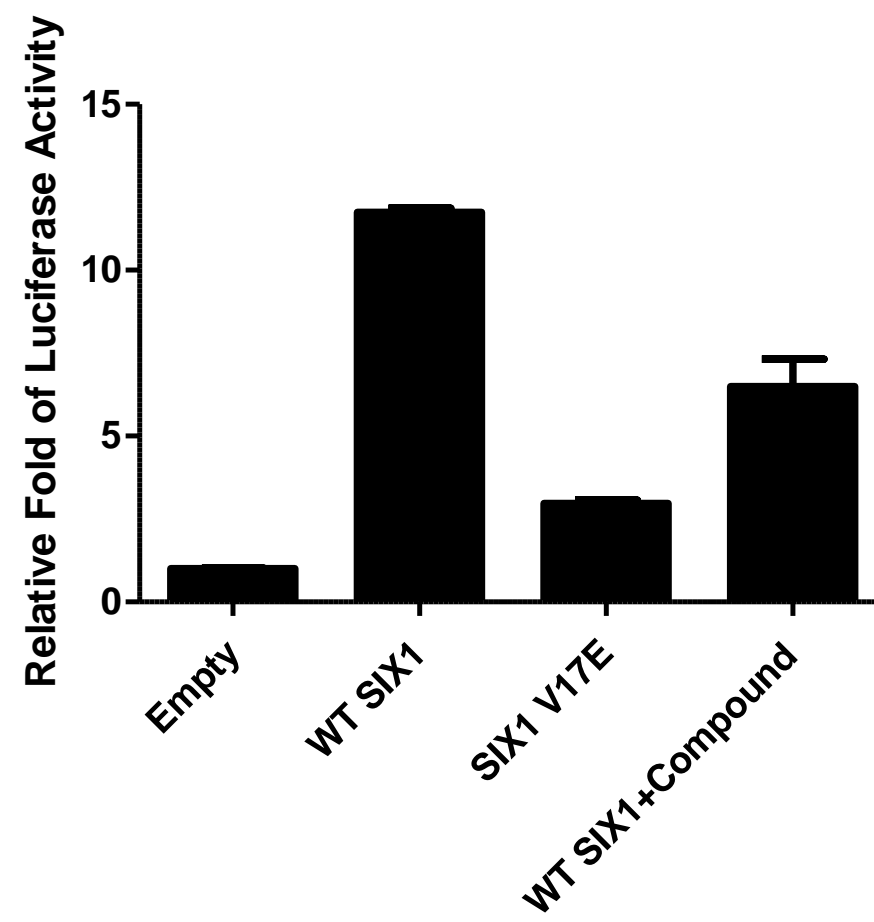

## Supp. Fig. 2

(a)

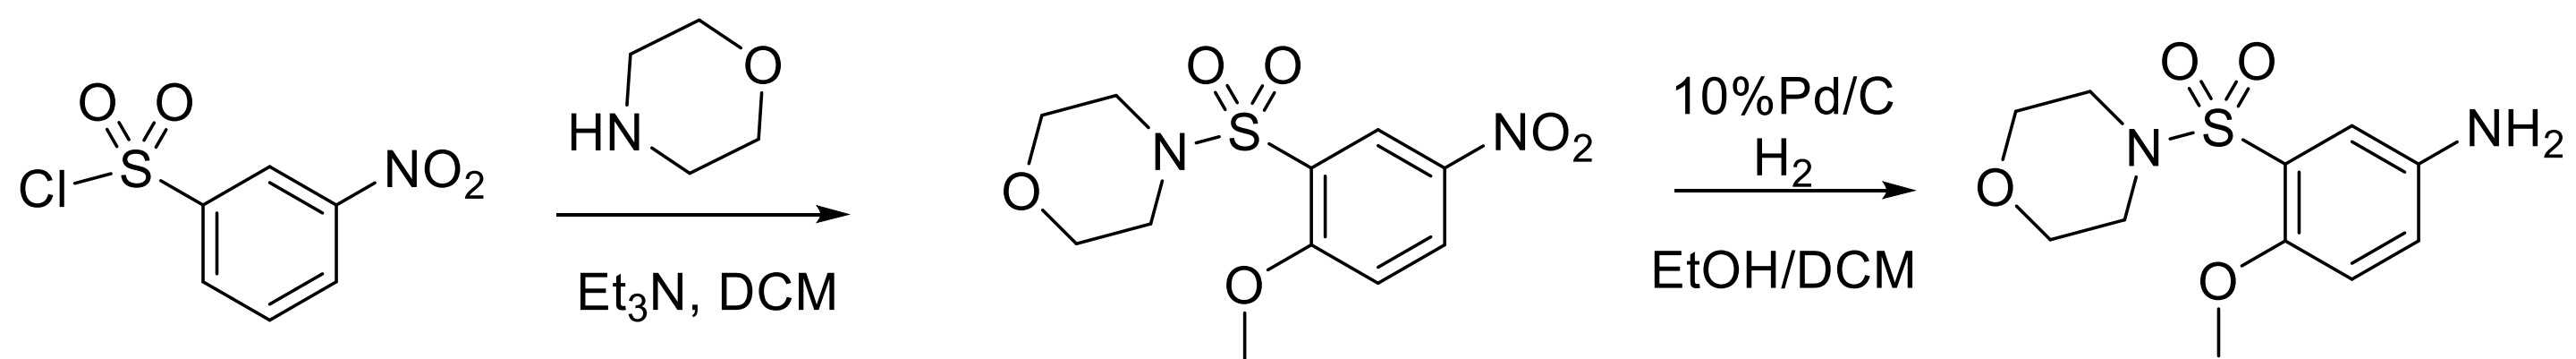

(b)

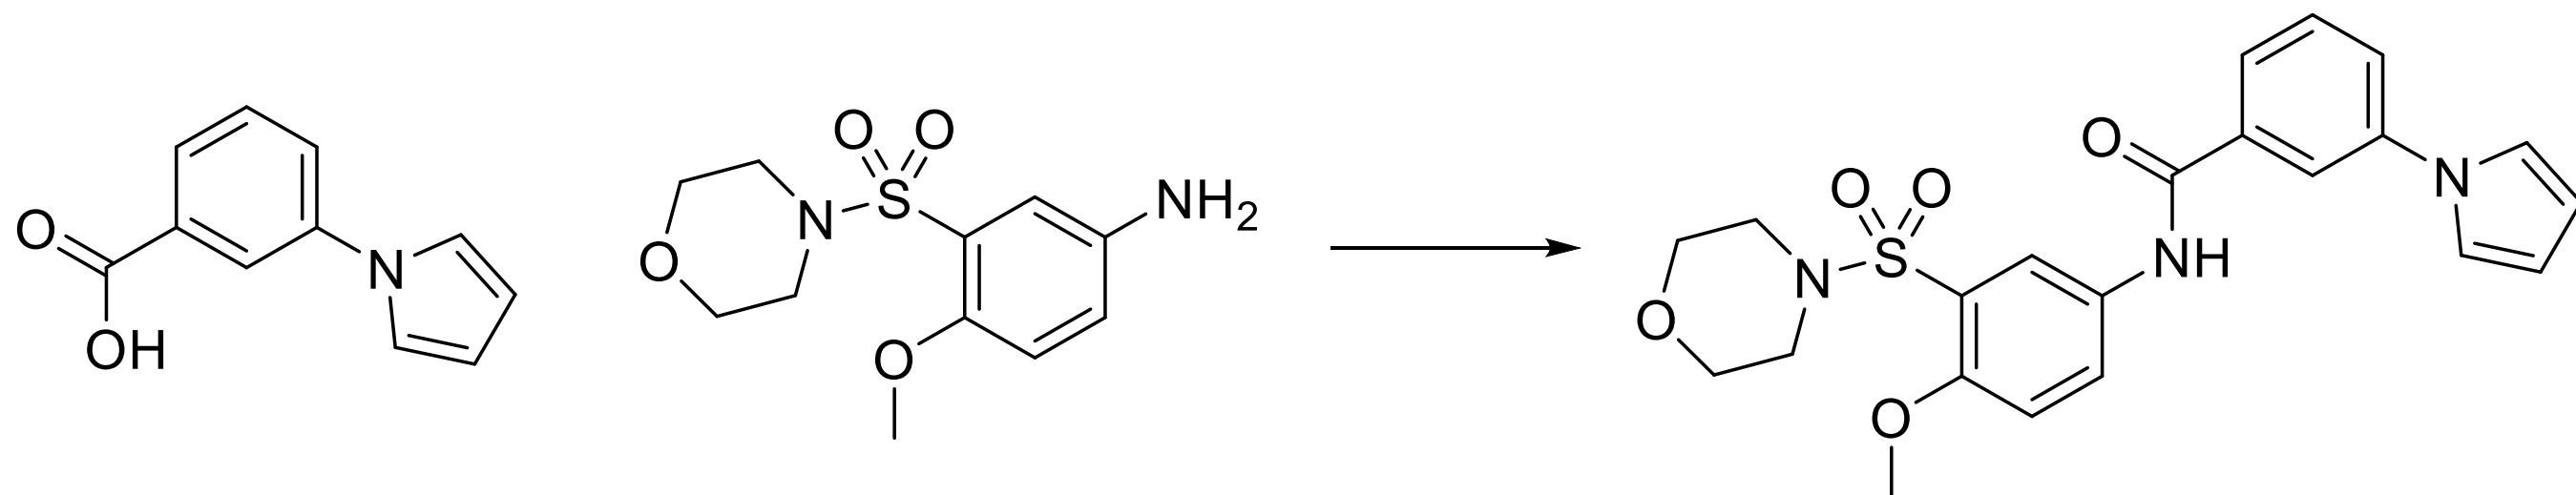

### Supp. Fig. 3

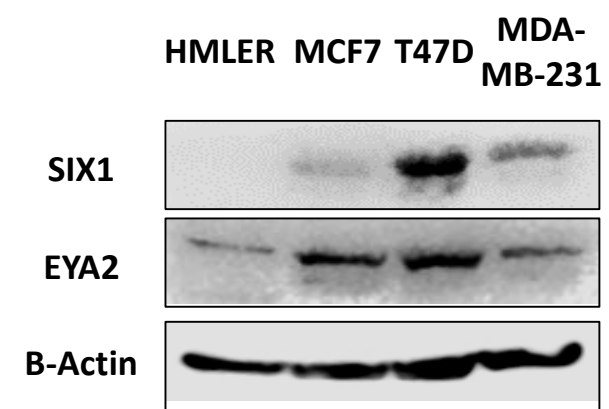

# Supp. Fig. 4

(a)

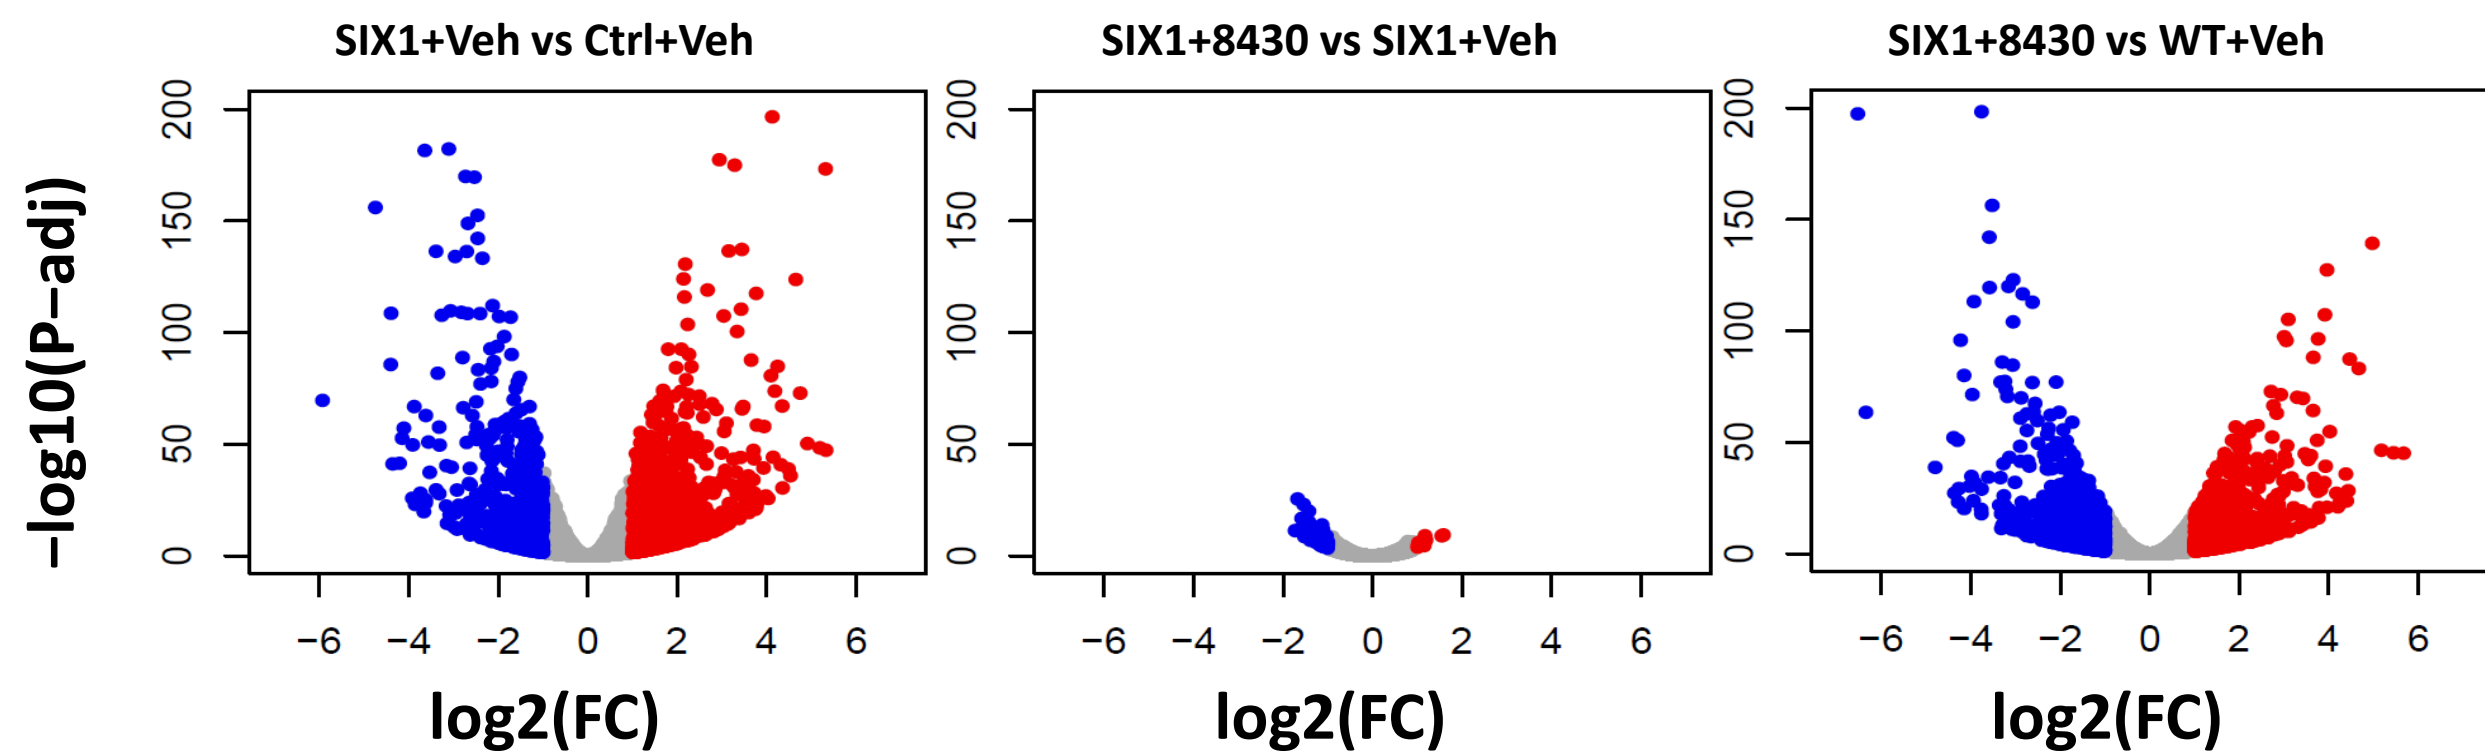

(b)

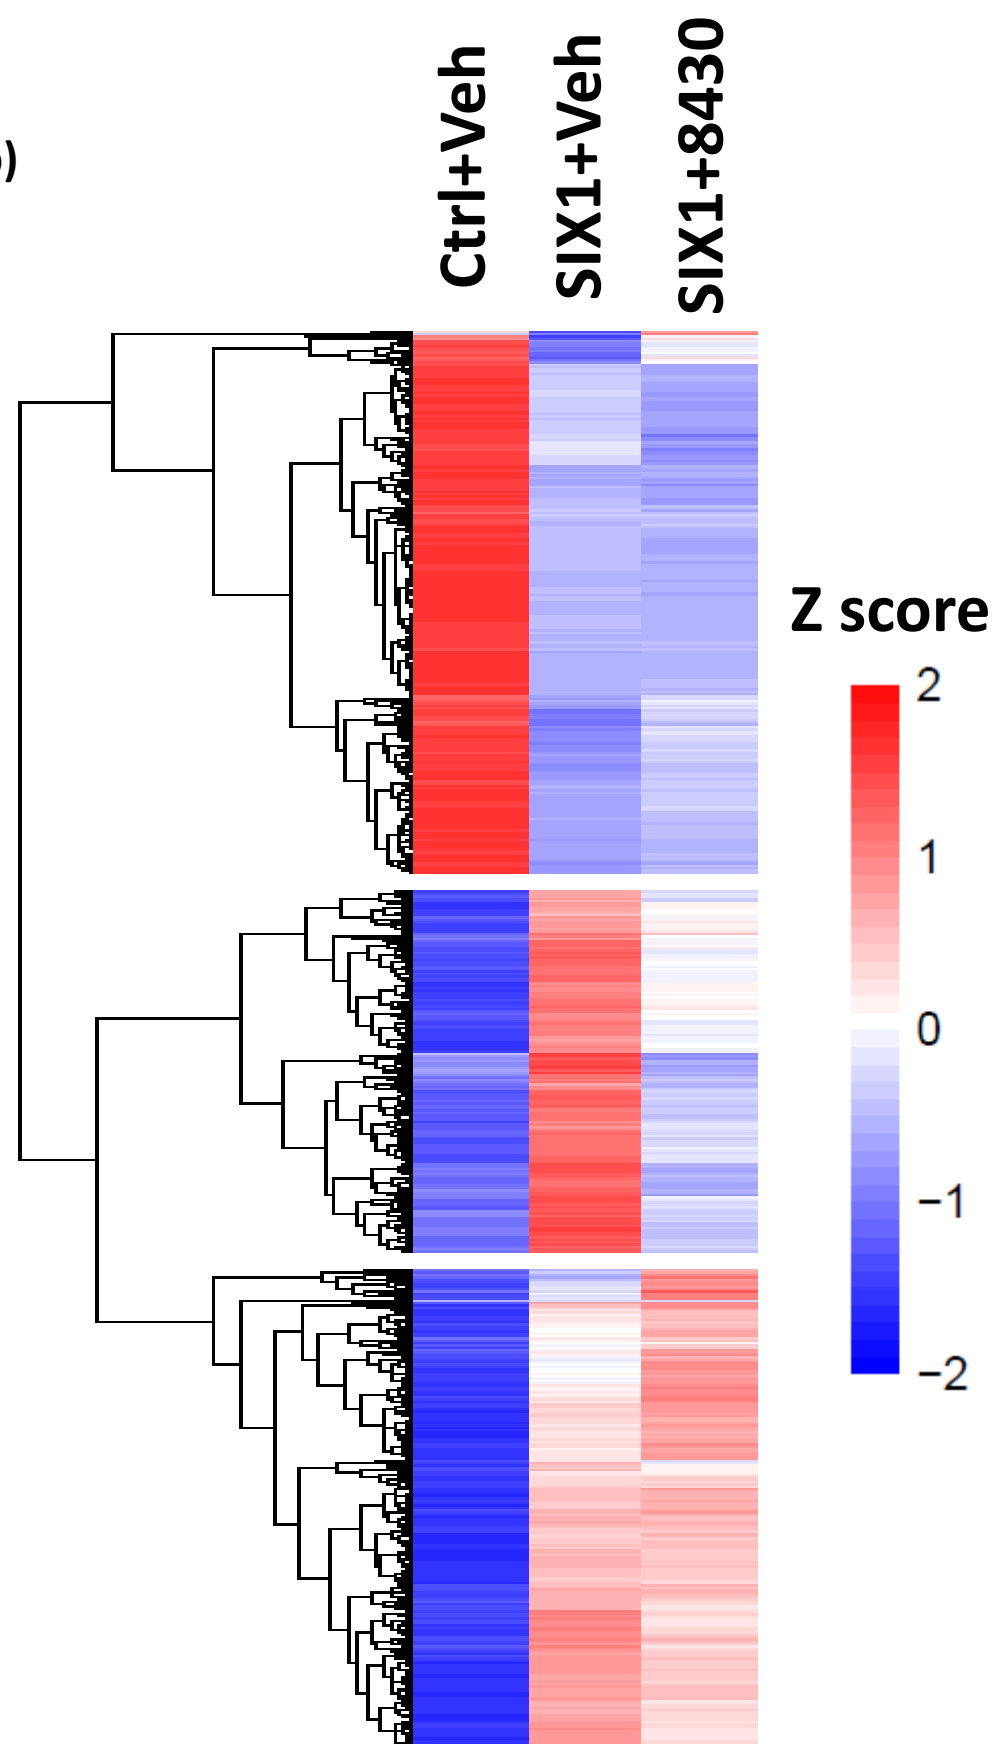

(c)

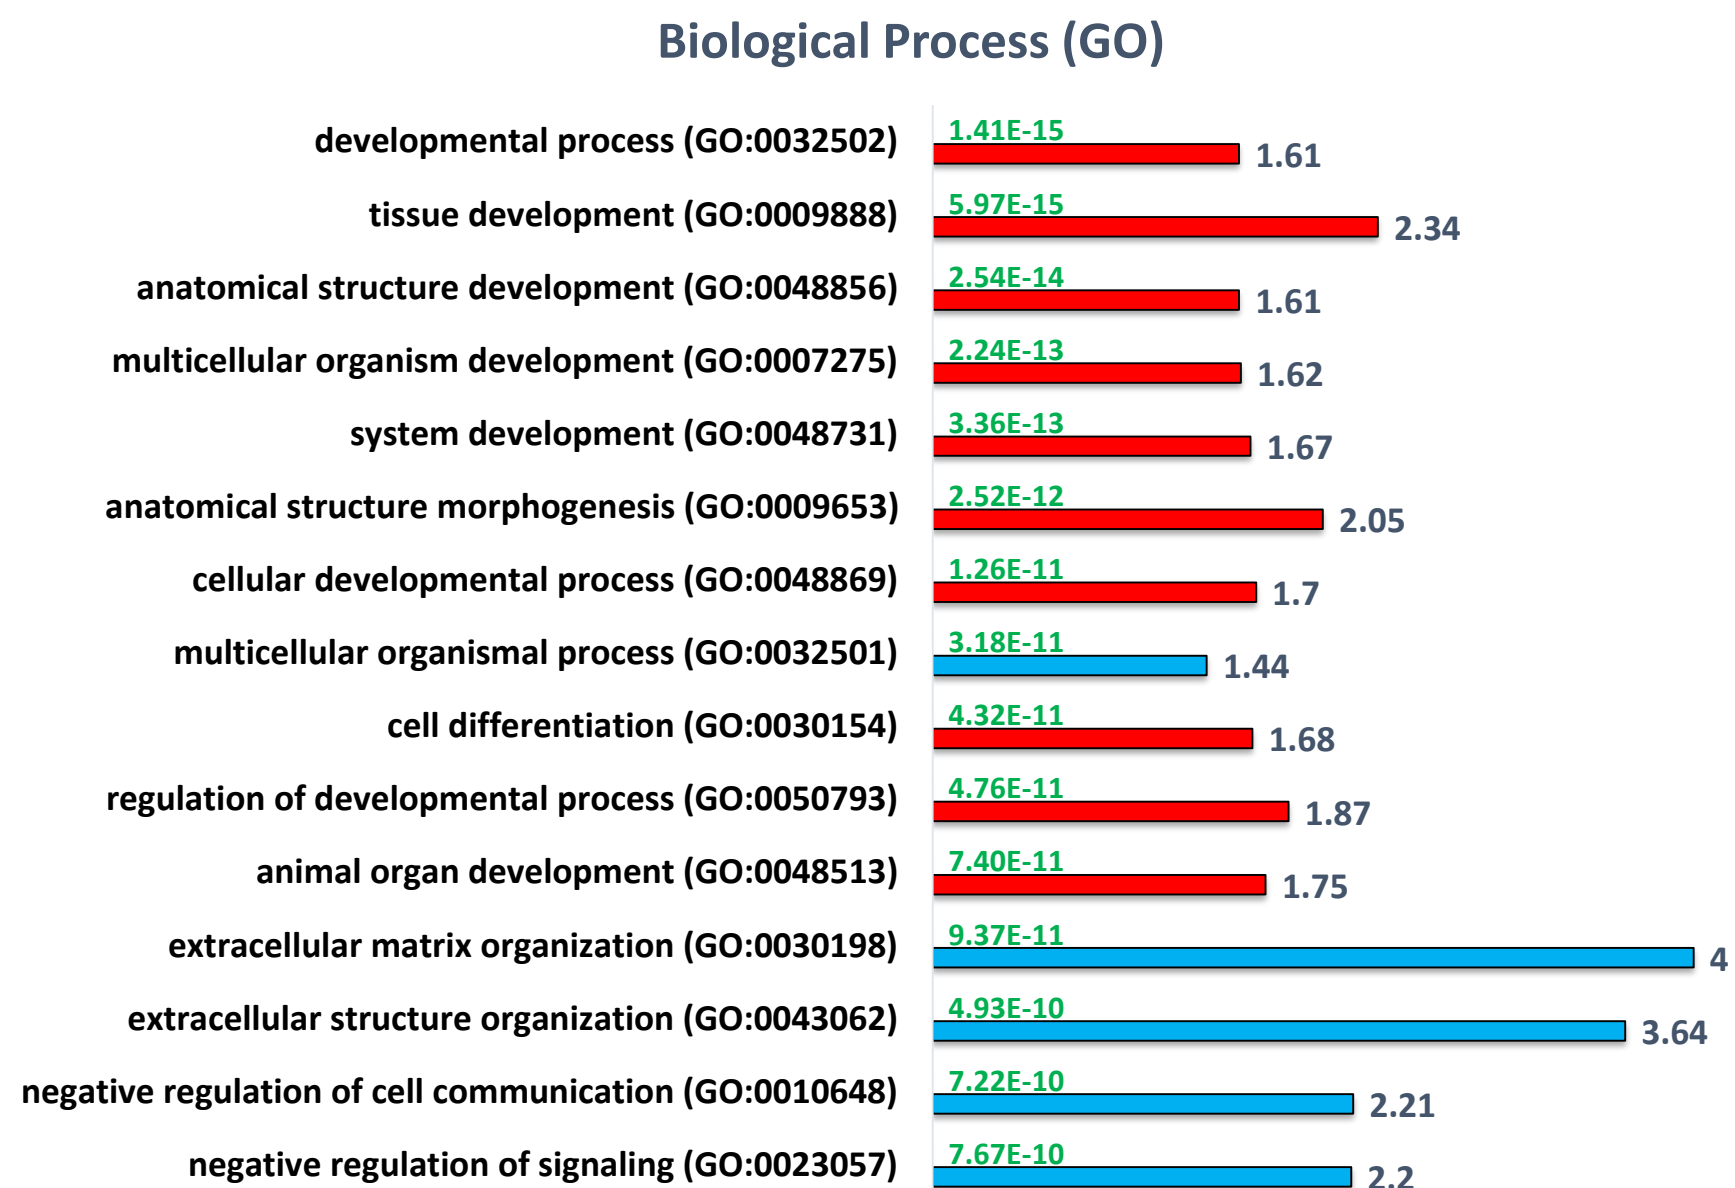

# Supp. Fig. 5

(a)

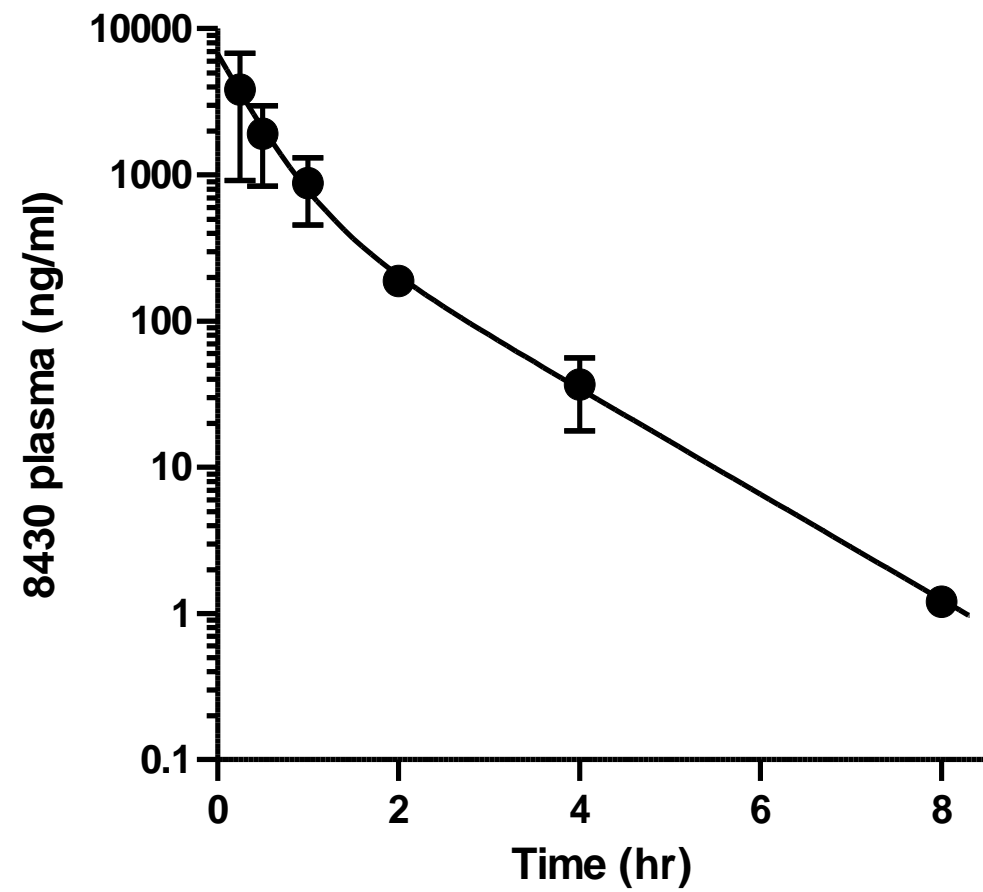

| PK Parameter         | Value |
|----------------------|-------|
| AUC (ng/ml x hr)     | 3234  |
| $C_{max}$ (ng/ml)    | 6703  |
| $t_{1/2\alpha}$ (hr) | 0.25  |
| $t_{1/2\beta}$ (hr)  | 0.83  |
| CL (L/hr/kg)         | 6.19  |
| $V_{ss}$ (L/kg)      | 4.08  |

(b)

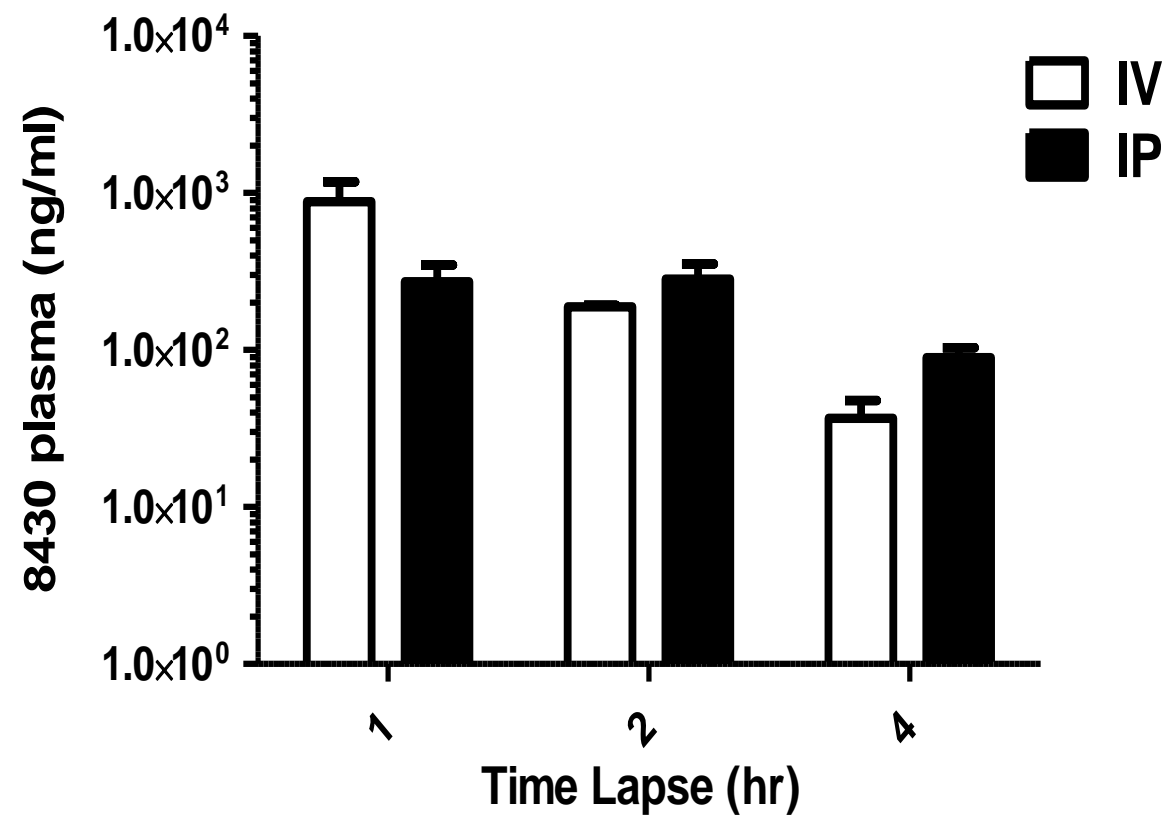

(c)

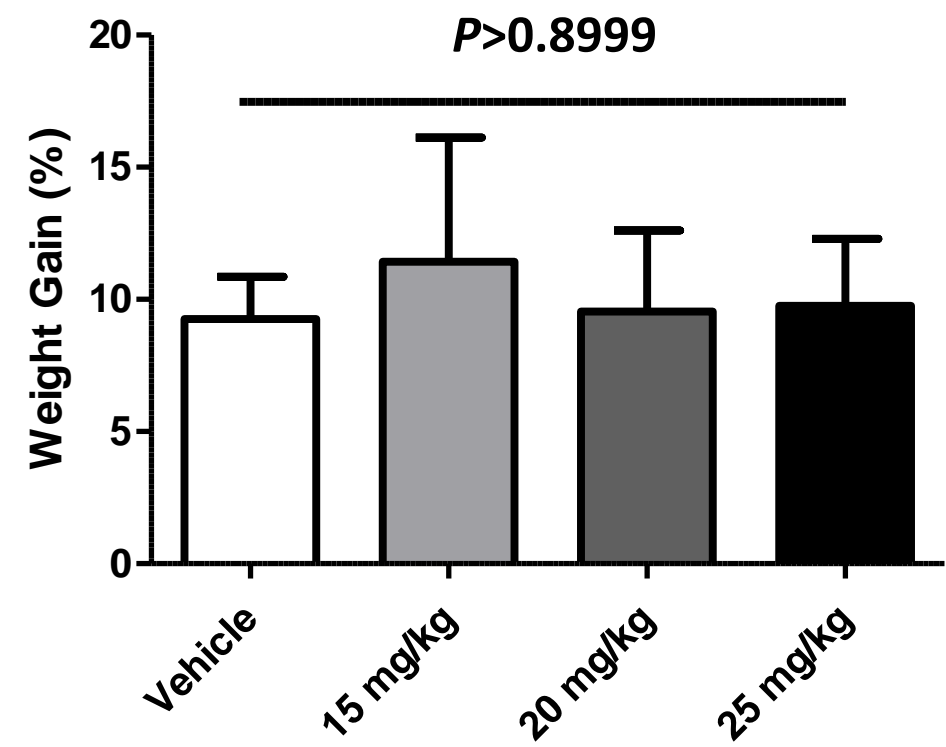

(d)

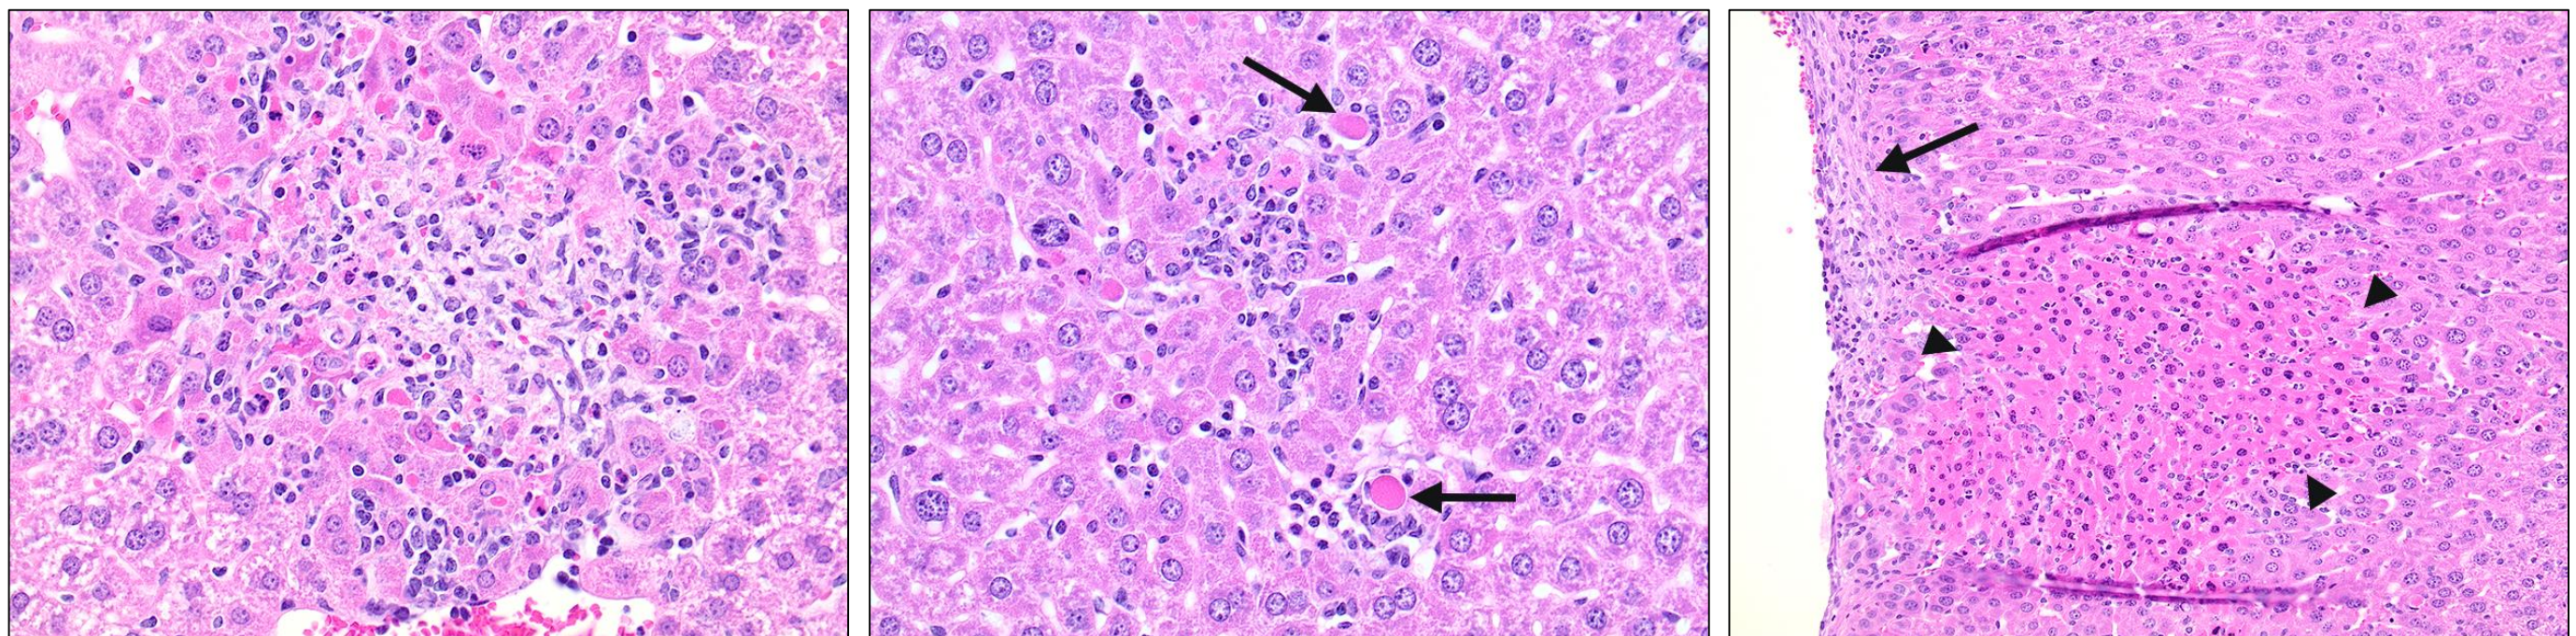

**Supp. Fig. 6**

(a)

**Veh**

**8430**

**Primary tumors**

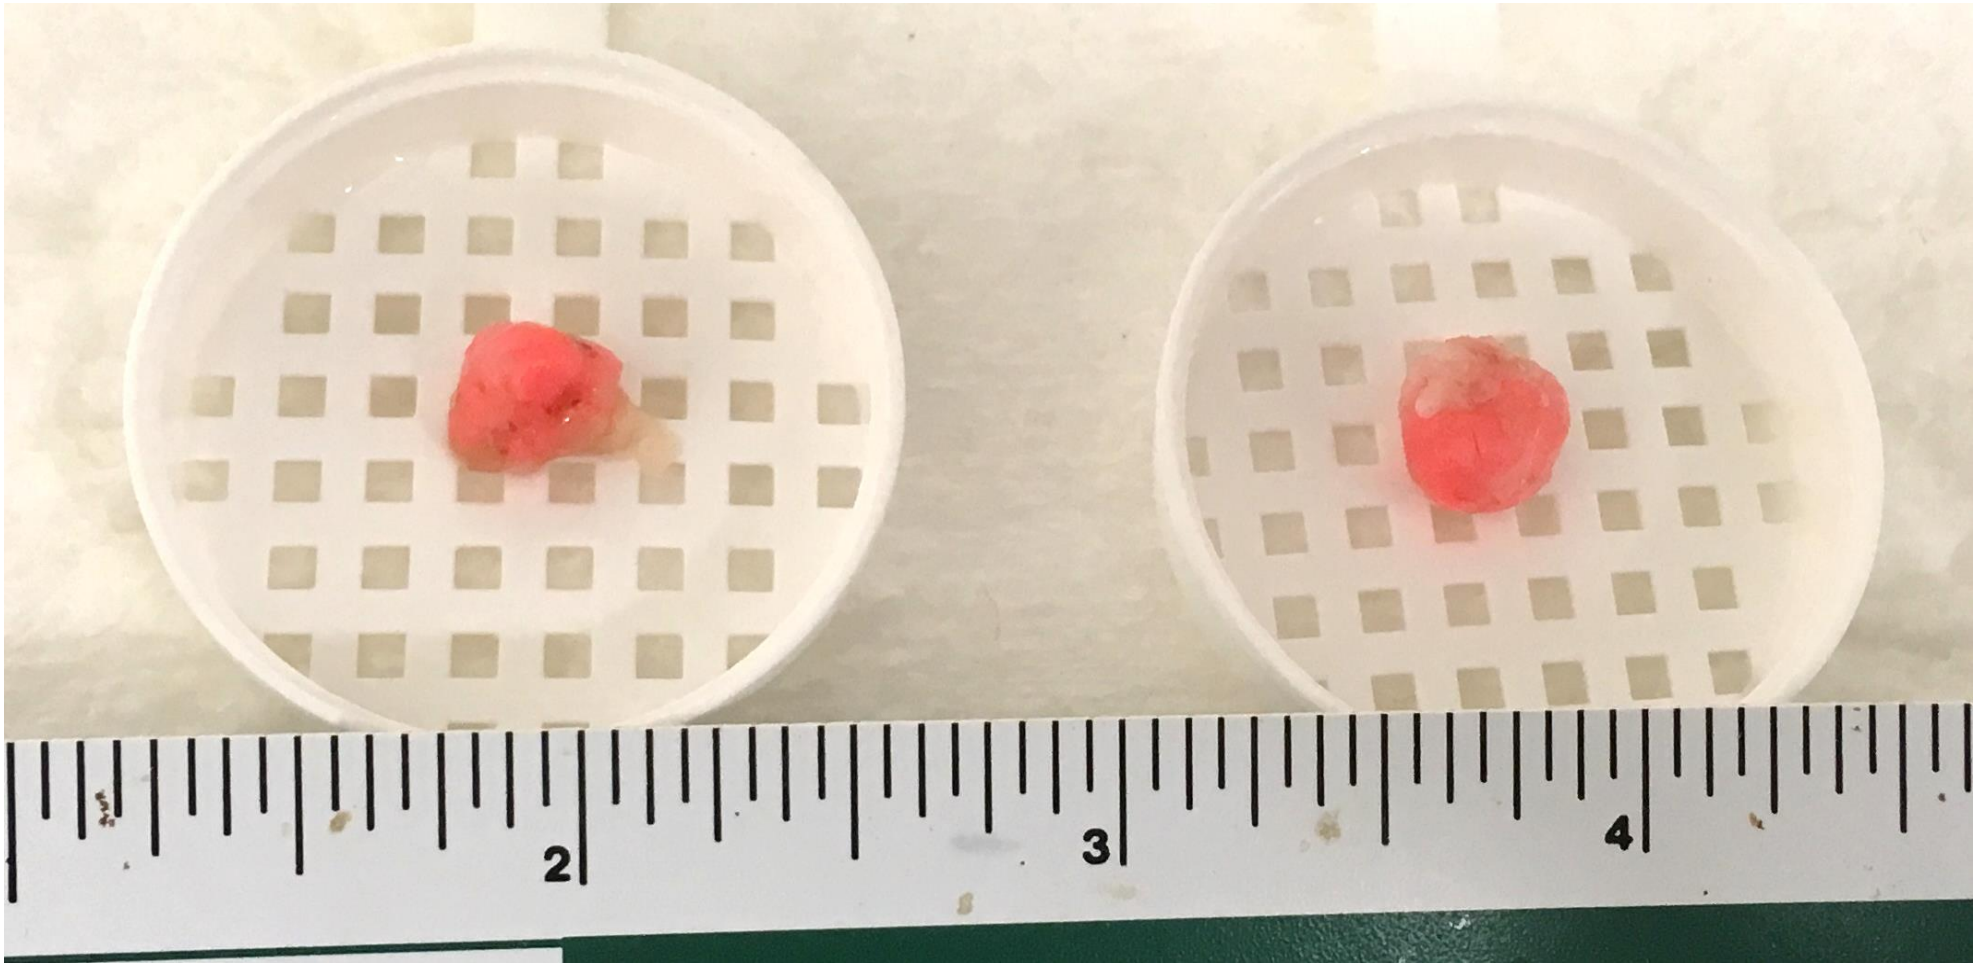

(b)

**Lymph node metastases**

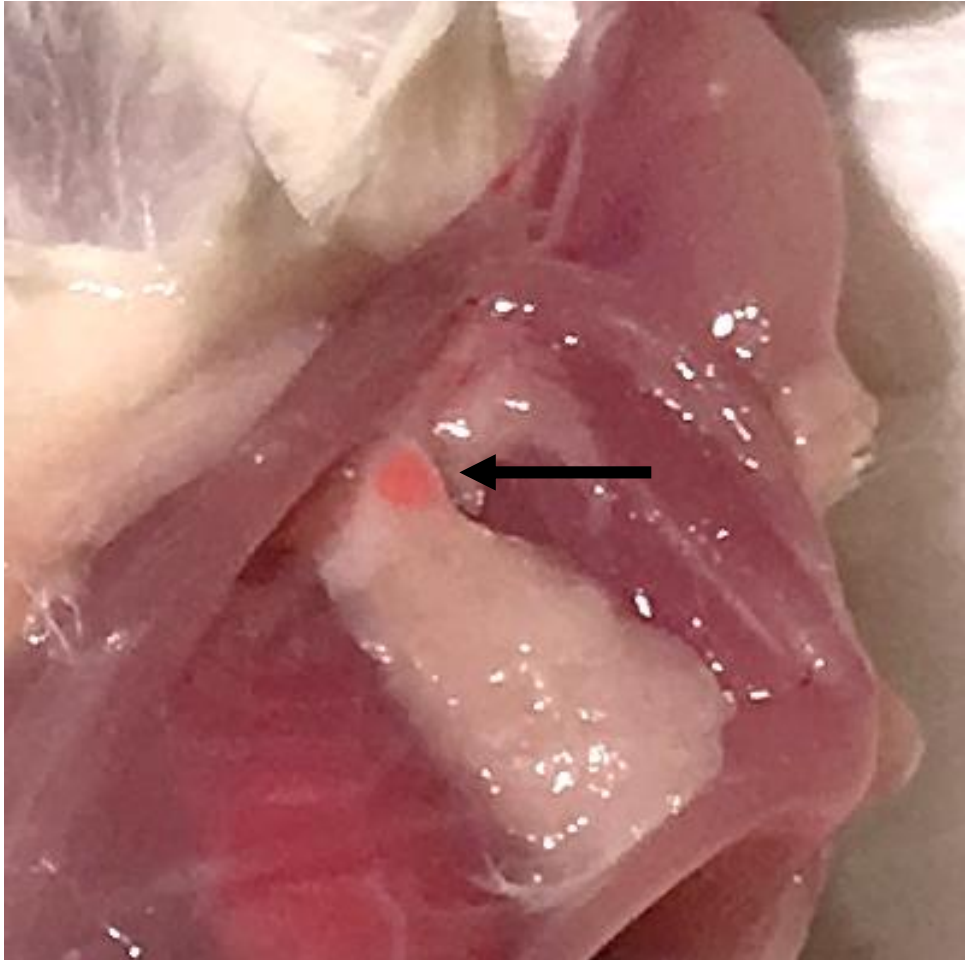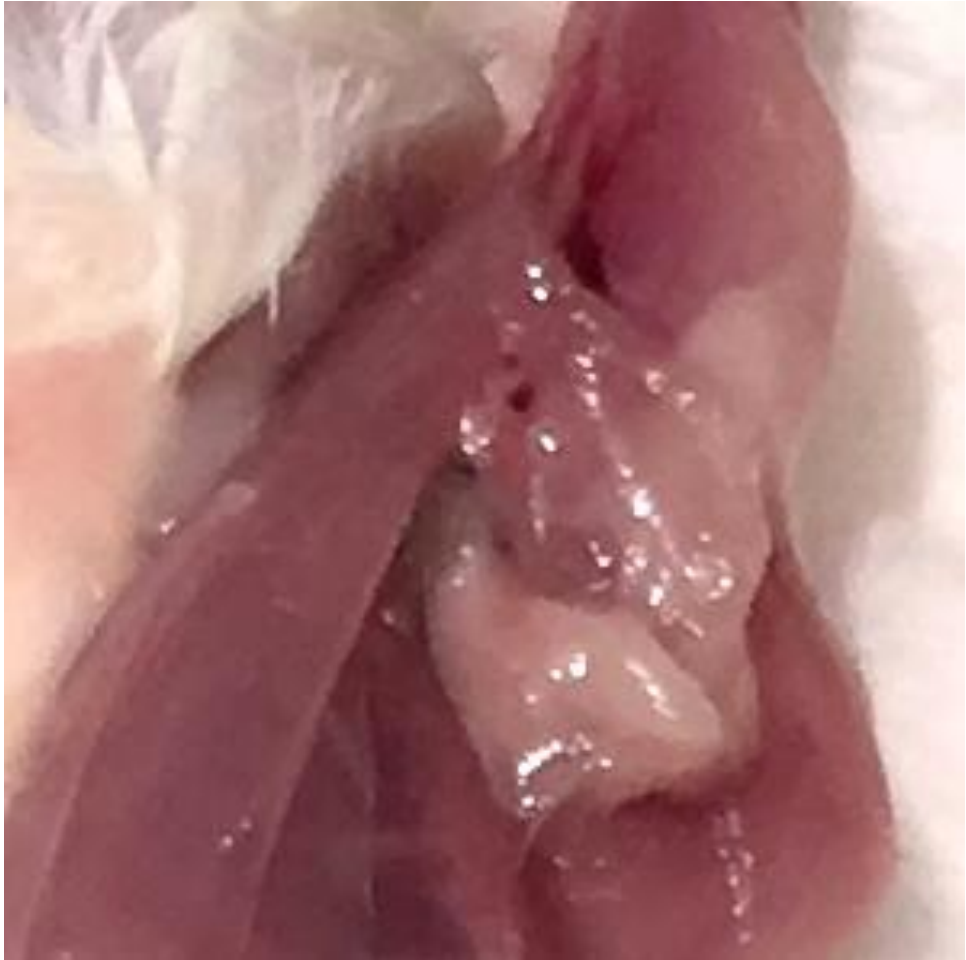

**Veh  
3/12**

**8430  
0/13**
